# Supplementary material for: Metal hydroxides as a conversion electrode for lithium-ion batteries: a case study with a Cu(OH)2nanoflower array
Source: Royal Society of Chemistry journal article supplement (doi:10.1039/c4ta03379e), 2014-09-05
Supplement: c4ta03379e1.pdf [file c4ta03379e1.pdf]

## Supplementary Information

### Metal hydroxides as conversion electrode for lithium-ion battery: A case study with $\text{Cu}(\text{OH})_2$ nanoflower array

Atin Pramanik, Sandipan Maiti and Sourindra Mahanty\*

*Fuel Cell & Battery Division*

*CSIR-Central Glass & Ceramic Research Institute*

*Kolkata 700032 India*

*and CSIR-Network Institutes for Solar Energy (NISE), India*

*E-mail: mahanty@cgcric.res.in; s\_mahanty@hotmail.com*

*Tel: +91-33-2322 3495 Fax: +91-33-2473 0957*

#### Reaction scheme for the synthesis of $\text{Cu}(\text{OH})_2$

For synthesis, aqueous solutions of  $[\text{Cu}(\text{NO}_3)_2 \cdot 9\text{H}_2\text{O}]$ , 25% ammonia and NaOH are used. The reaction proceeds through formation of an octahedral metal complex intermediate,  $[\text{Cu}(\text{NH}_3)_6]^{2+}$  as shown below:

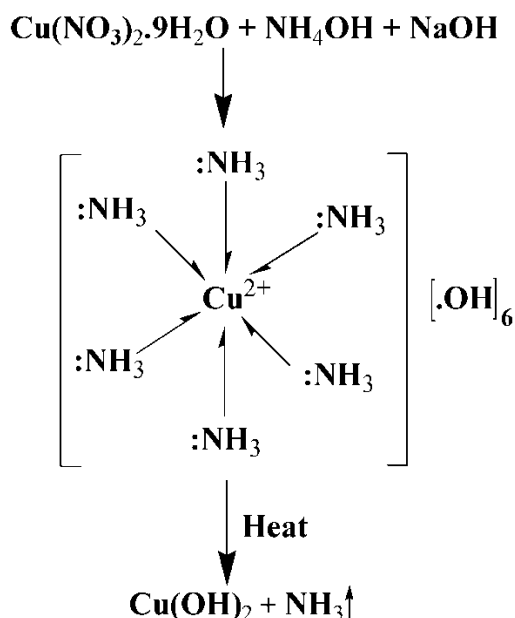

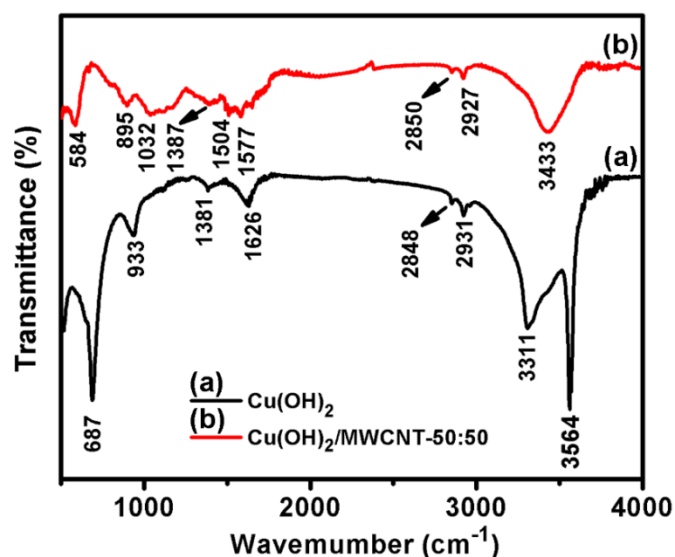

**Figure S1:** FTIR spectra of (a) as-synthesized  $\text{Cu}(\text{OH})_2$  and (b)  $\text{Cu}(\text{OH})_2/\text{MWCNT-50:50}$ . In the as-synthesised  $\text{Cu}(\text{OH})_2$ , presence of peaks at 3564 and 3311  $\text{cm}^{-1}$  reflect stretching modes of hydroxyl groups in the  $\text{Cu}(\text{OH})_2$ .<sup>1</sup> The peak at 1626  $\text{cm}^{-1}$  reflects the bending mode of the absorbed water in the as synthesised  $\text{Cu}(\text{OH})_2$  powder.<sup>2</sup> C-O stretching vibration at 933  $\text{cm}^{-1}$  can be assigned to the corresponding metal cation ( $\text{Cu}^{2+}$ ) in  $\text{Cu}(\text{OH})_2$ .<sup>3,4</sup> A new absorption band at 1032  $\text{cm}^{-1}$  in the composite material is due to MWCNT. A broad peak at 3433  $\text{cm}^{-1}$  appears instead of two separate peaks which were present in the bulk material and can be related to partial obliteration of hydrogen bonds.

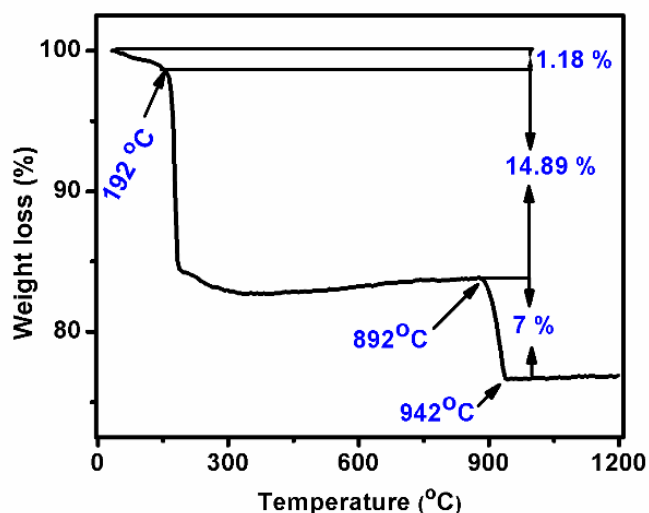

**Figure S2:** TGA curve for the as-synthesized  $\text{Cu}(\text{OH})_2$  nanoflowers at a heating rate of  $10^\circ \text{min}^{-1}$  under argon flow. The observed weight losses can be divided into three steps: (i)  $\sim 1.2\%$  weight loss occurs in the temperature range  $30^\circ\text{--}192^\circ\text{C}$  due to the loss of physically absorbed water (ii)  $\sim 14.9\%$  weight loss in the  $192\text{--}892^\circ\text{C}$  range represents transformation from  $\text{Cu}(\text{OH})_2$  to  $\text{CuO}$  and finally, (iii)  $\sim 7.0\%$  weight loss in the  $892\text{--}942^\circ\text{C}$  range represents the formation of metallic  $\text{Cu}$  from  $\text{CuO}$ .

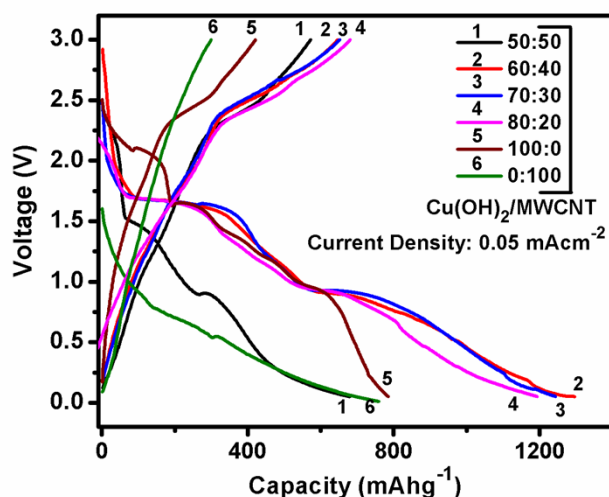

**Figure S3:** Initial discharge/charge voltage profiles for different composites of  $\text{Cu}(\text{OH})_2$  and MWCNT at a current density of  $0.05 \text{ mAcm}^{-2}$ . All composites except  $\text{Cu}(\text{OH})_2/\text{MWCNT}$ -50:50 show a low Columbic efficiency of 50-57%. Surprisingly,  $\text{Cu}(\text{OH})_2/\text{MWCNT}$ -50:50 composite shows a very high Columbic efficiency of 84% which may be attributed to synergic interaction with MWCNT and lower degree of structural disorder/defects.

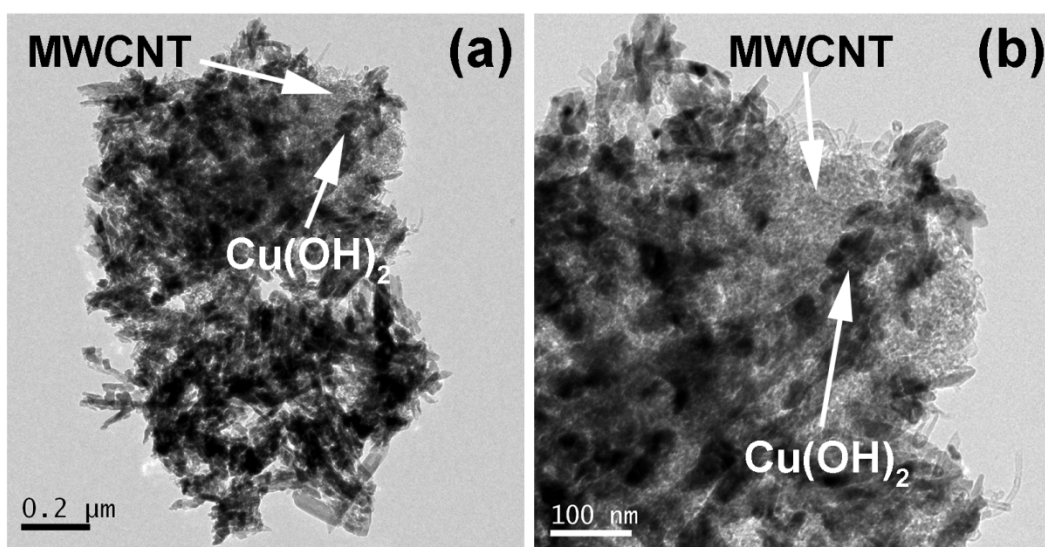

**Figure S4:** TEM images of  $\text{Cu}(\text{OH})_2/\text{MWCNT}$ -50:50 composite. Clusters of short nanorod bundles of  $\text{Cu}(\text{OH})_2$  are formed from partial destruction of the flower like grains by hand grinding. An intimate attachment of MWCNT over  $\text{Cu}(\text{OH})_2$  is observed which would provide an enhanced intra-grain and inter-grain electron transport. At the same time, MWCNT would also act as a buffer matrix to absorb the volume changes associated with the conversion reactions.

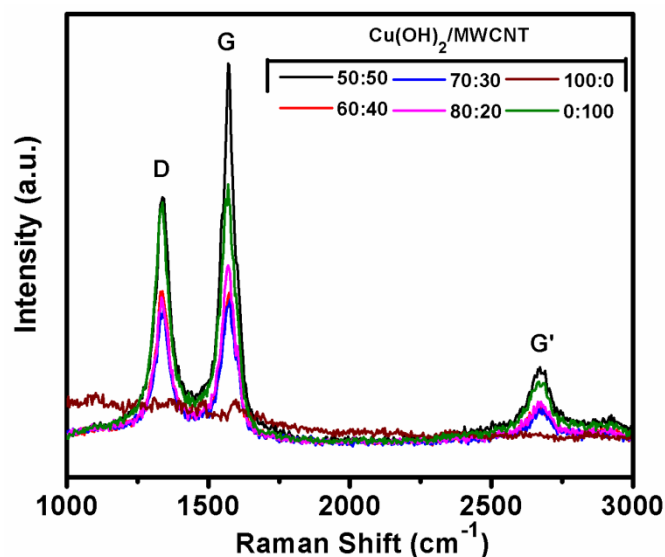

**Figure S5:** Raman spectra of  $\text{Cu(OH)}_2/\text{MWCNT}$  composites. The G band ( $1570\text{ cm}^{-1}$ ) is related to the presence of  $\text{sp}^2$ -hybridized carbon and corresponds to the  $\text{E}_{2g}$  phonons. The D band ( $1340\text{ cm}^{-1}$ ) is originated from disordered graphitic carbon due to the breathing modes of six-atom rings and requires a defect for its activation. The  $\text{G}'$  band ( $2670\text{ cm}^{-1}$ ) is actually the second order D peak. From the intensity ratio  $I_D/I_G$  and  $I_{G'}/I_G$ , the relative degree of crystallographic disorder/defects can be estimated<sup>5,6</sup>.  $\text{Cu(OH)}_2/\text{MWCNT}$ -50:50 shows the lowest  $I_D/I_G$  and  $I_{G'}/I_G$  among all the composites indicating lowest concentration of structural disorder/defects.

**Table S1: Raman spectroscopy data for  $\text{Cu(OH)}_2/\text{MWCNT}$  composites**

| Sample Name                           | $I_D/I_G$ | $I_{G'}/I_G$ |
|---------------------------------------|-----------|--------------|
| $\text{Cu(OH)}_2/\text{MWCNT}$ -50:50 | 0.64      | 0.21         |
| $\text{Cu(OH)}_2/\text{MWCNT}$ -60:40 | 0.99      | 0.30         |
| $\text{Cu(OH)}_2/\text{MWCNT}$ -70:30 | 0.94      | 0.28         |
| $\text{Cu(OH)}_2/\text{MWCNT}$ -80:20 | 0.82      | 0.26         |
| MWCNT                                 | 0.93      | 0.25         |

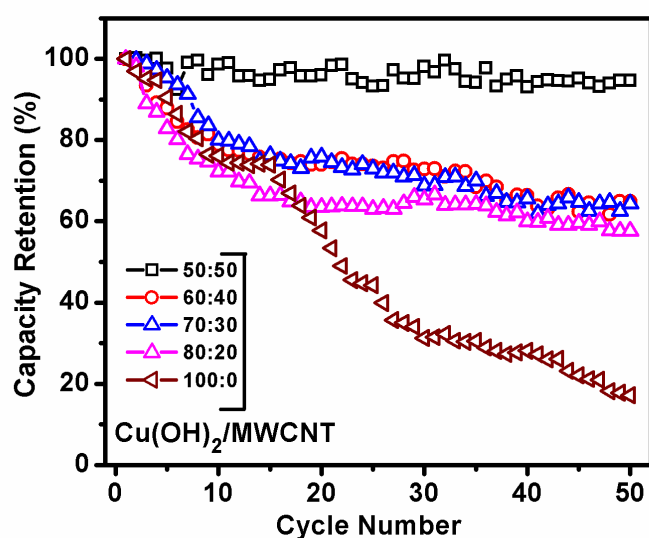

**Figure S6:** Capacity retention for different composites of Cu(OH)<sub>2</sub>/MWCNT. Capacity retention increases with the increasing amount of MWCNT in the composite. The capacity retention is maximum (~ 95%) when Cu(OH)<sub>2</sub>/MWCNT ratio is 50:50. Other composites of Cu(OH)<sub>2</sub>/MWCNT (80:20, 70:30 and 60:40) show about 60-65% of capacity retention whereas, the pristine Cu(OH)<sub>2</sub> retains only 16 % capacity after 50 cycles.

**Table S2: Impedance spectroscopy data of Cu(OH)<sub>2</sub>/MWCNT-50:50 composite anode after different cycling intervals**

| Cu(OH) <sub>2</sub> /MWCNT-50:50<br>(At different cycling intervals) | Rs<br>(Ohm) | Rct<br>(Ohm) | Q                     |       | W (mMho) | C (mF) |
|----------------------------------------------------------------------|-------------|--------------|-----------------------|-------|----------|--------|
|                                                                      |             |              | Y <sub>0</sub> (μMho) | N     |          |        |
| As assembled state                                                   | 1.3         | 70.5         | 12.4                  | 0.851 | 20.0     | 22.5   |
| After 1 <sup>st</sup> cycle                                          | 1.4         | 101          | 32.0                  | 0.753 | 11.1     | 19.1   |
| After 20 <sup>th</sup> cycle                                         | 1.9         | 50.1         | 86.2                  | 0.65  | 12.0     | 17     |
| After 40 <sup>th</sup> cycle                                         | 3.1         | 34.9         | 98.2                  | 0.59  | 13.3     | 16.5   |
| After 60 <sup>th</sup> cycle                                         | 3.5         | 37.3         | 103.2                 | 0.44  | 9.96     | 15.8   |
| After 80 <sup>th</sup> cycle                                         | 4.0         | 42.8         | 144.4                 | 0.37  | 11.3     | 12.8   |
| After 100 <sup>th</sup> cycle                                        | 4.9         | 41.9         | 142.7                 | 0.39  | 10.2     | 14.7   |

### References:

- 1 L. Zhang, W. Lu, Y. Feng, J. Ni, Y. Lü, X. Shang, *Acta Phys. -Chim. Sin.*, 2008, **24**, 2257.
- 2 K. Nakamoto, Infrared spectra of inorganic and coordination compound. 4<sup>th</sup> ed. Trans. D. R. Huang, R. Q. Wang, Beijing: Chemical Industry Press, 1991:251.
- 3 A. Bernson, J. Lindgren, W. Huang, R. Frech, *Polymer*, 1995, **36**, 4471.

4 J. M. Aguirre, A. Gutierrezb and O. Giraldo, *J. Braz. Chem. Soc.*, 2011, **22**, 546.

5 A. C. Ferrari and J. Robertson, *Phys. Rev. B*, 2001, **64**, 075414.

6 L. G. Cancado, A. Jorio, E. H. Martins Ferreira, F. Stavale, C. A. Achete, R. B. Capaz, M. V. O. Moutinho, A. Lombardo, T. S. Kulmala and A. C. Ferrari, *Nano Lett.* 2011, **11**, 3190.
